# Supplementary material
Source: PubMed Central journal article supplement (PMC4590282)
Supplement: NIHMS723009-supplement-supplemental_figs.pdf [file NIHMS723009-supplement-supplemental_figs.pdf]

# Spontaneously immortalized BMSCs

(derived from murine bone marrow as reported in Krebsbach et al, Transplantation 63:1059, 1997)

## In vitro mineralization assay (alizarin red S)

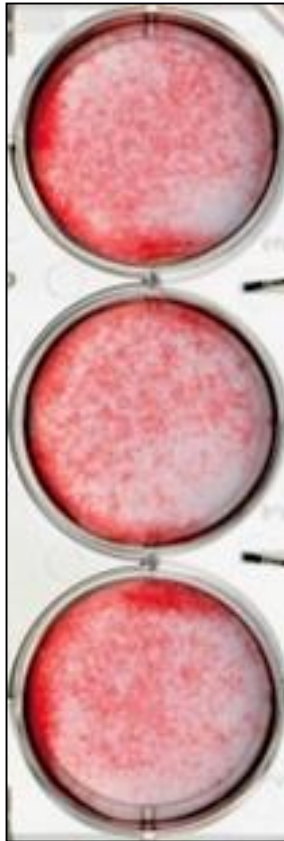

**immortalized murine BMSCs  
+ Dex/Asc/bGP**

## In vivo transplantation (H&E)

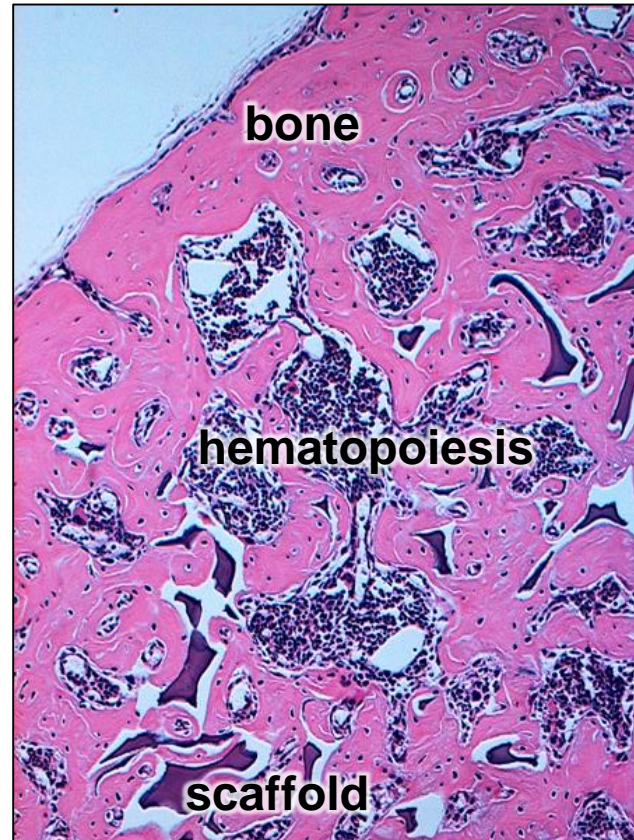

immortalized murine BMSCs transplanted in a collagen  
sponge subcutaneously in a immunocompromised mouse

## Supplementary Figure 1

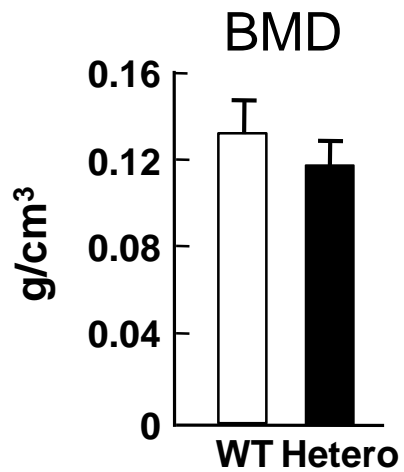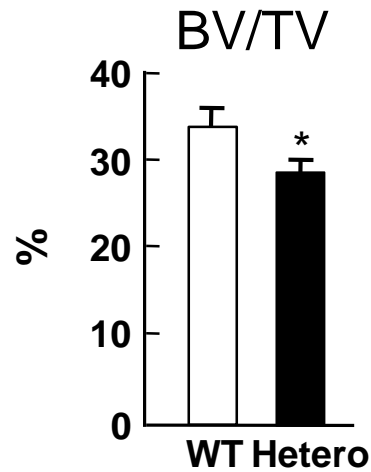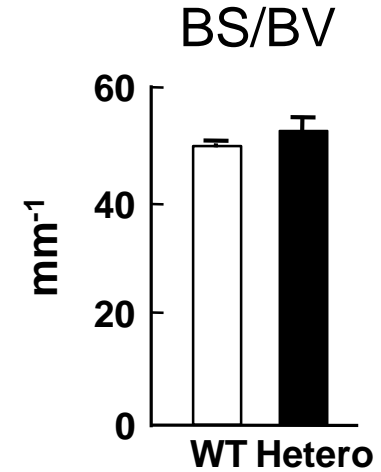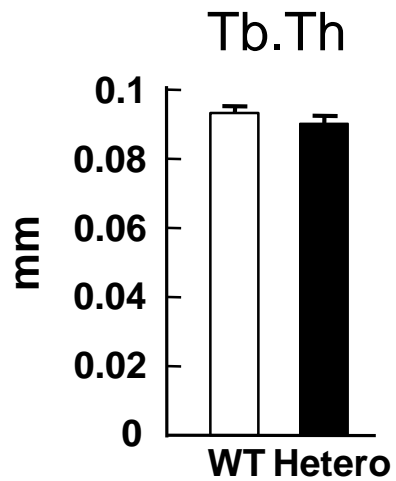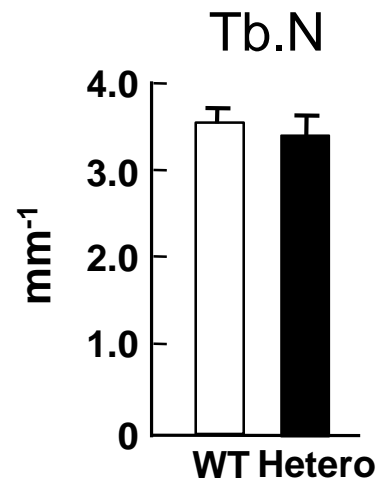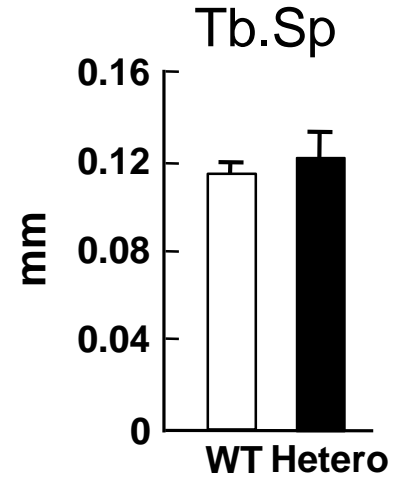

**Supplementary Figure 2**

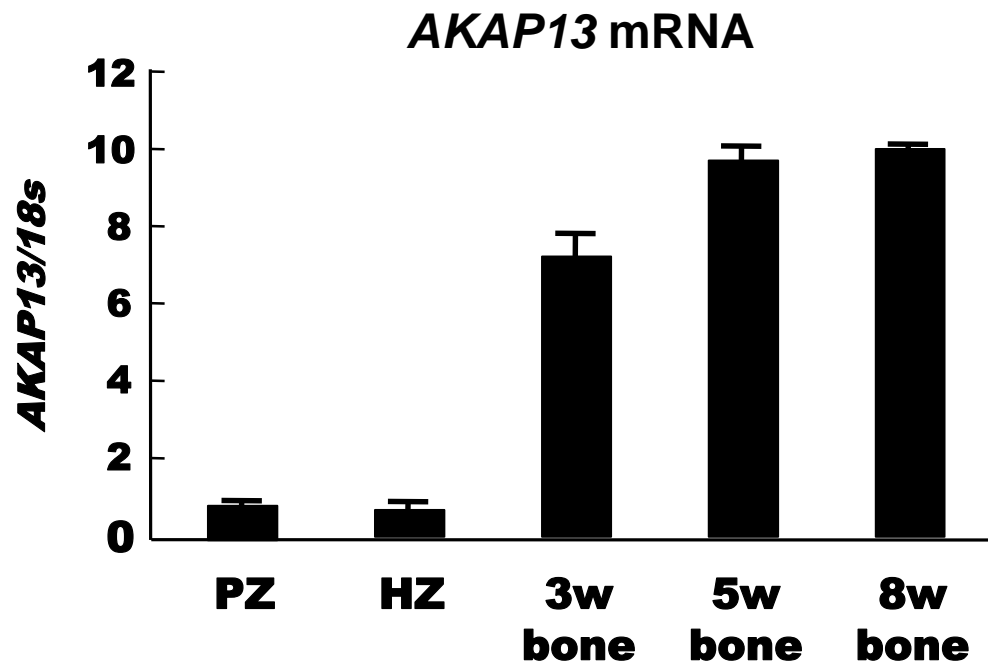

**Supplementary Figure 3**

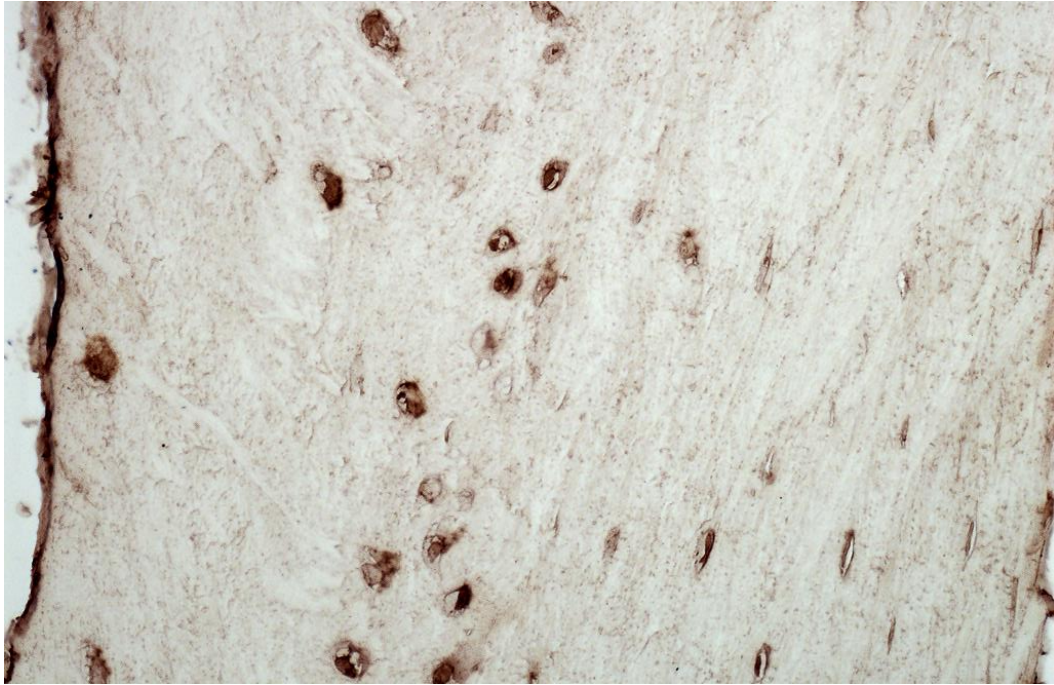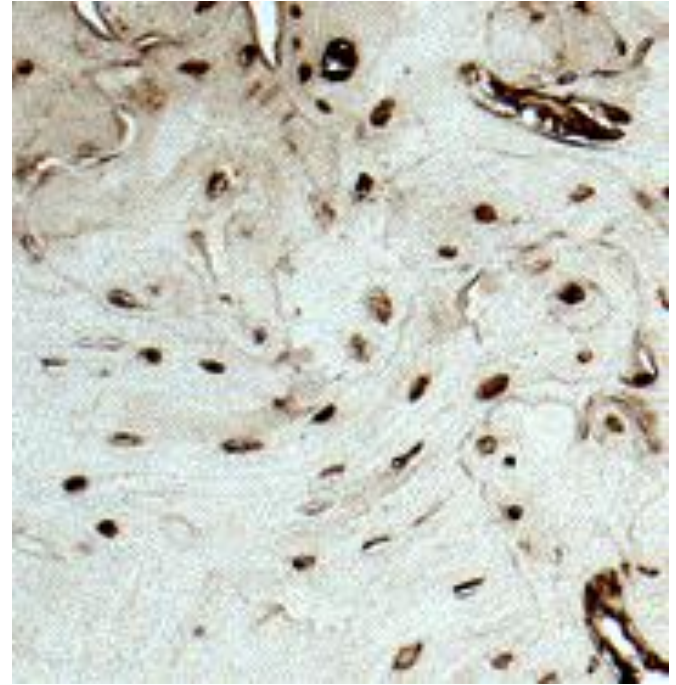

**Supplementary Figure 4**

# AKAP 13 Haploinsufficient

---

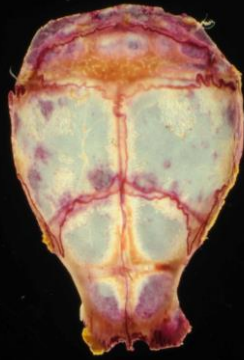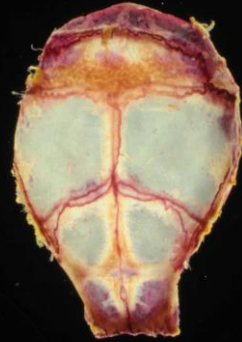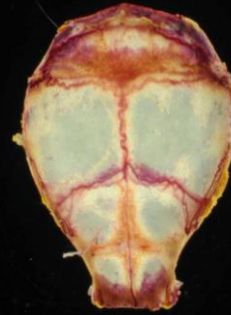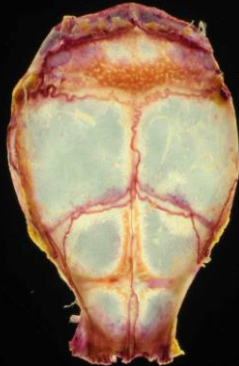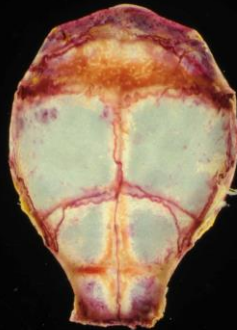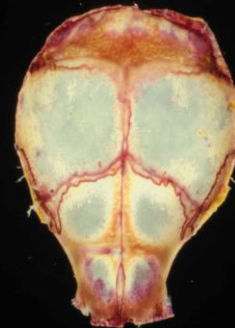

---

**Wild type**

**Supplementary Figure 5**



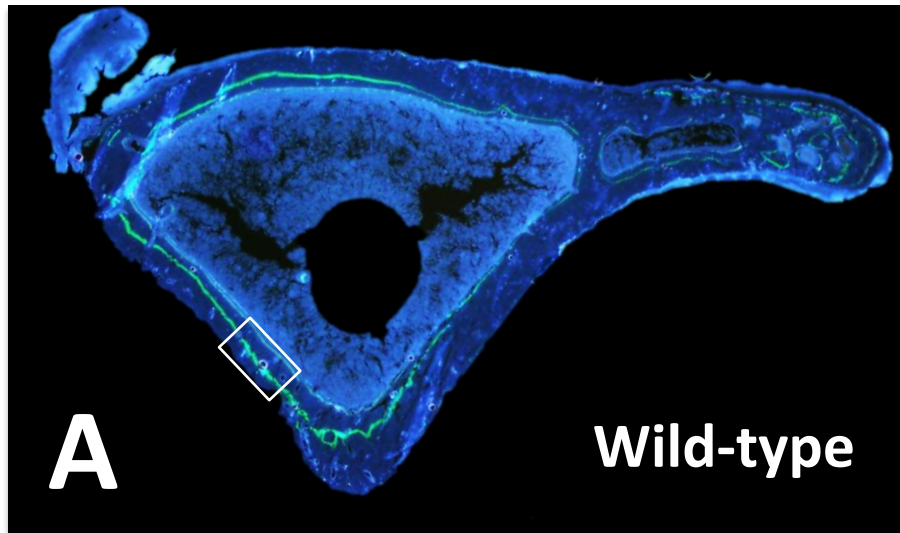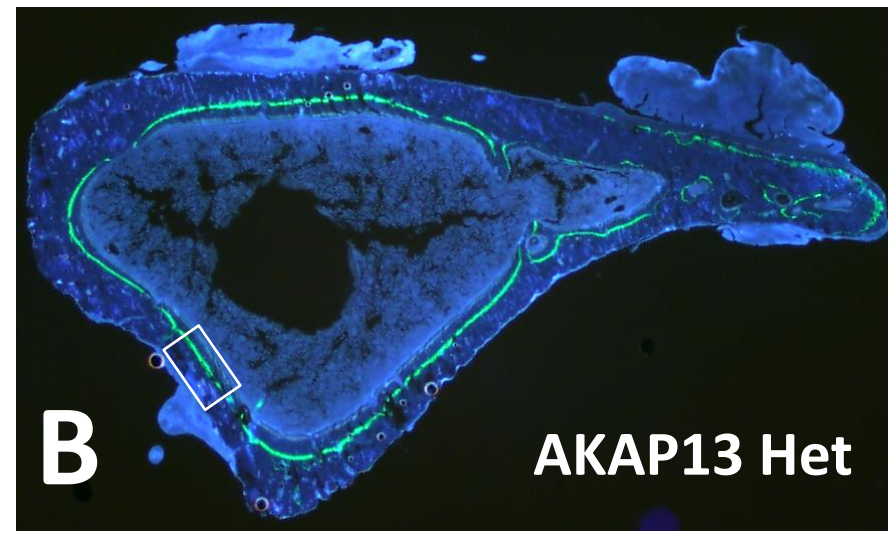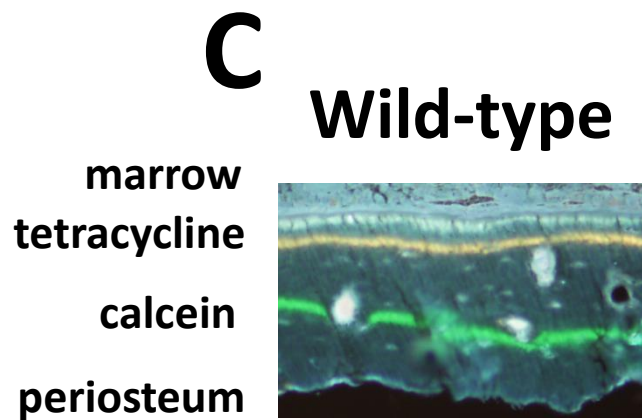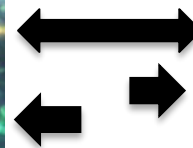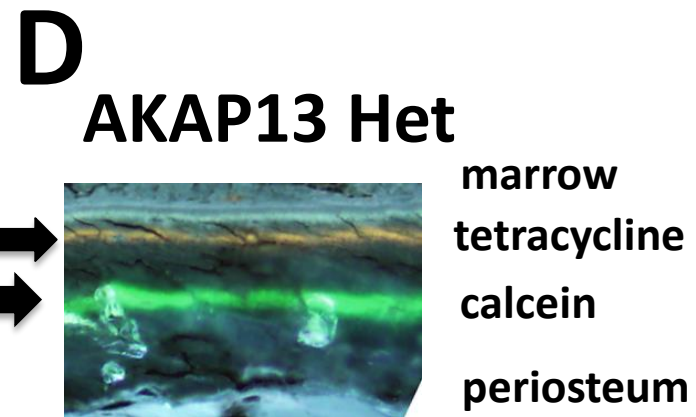

Supplementary Figure 6

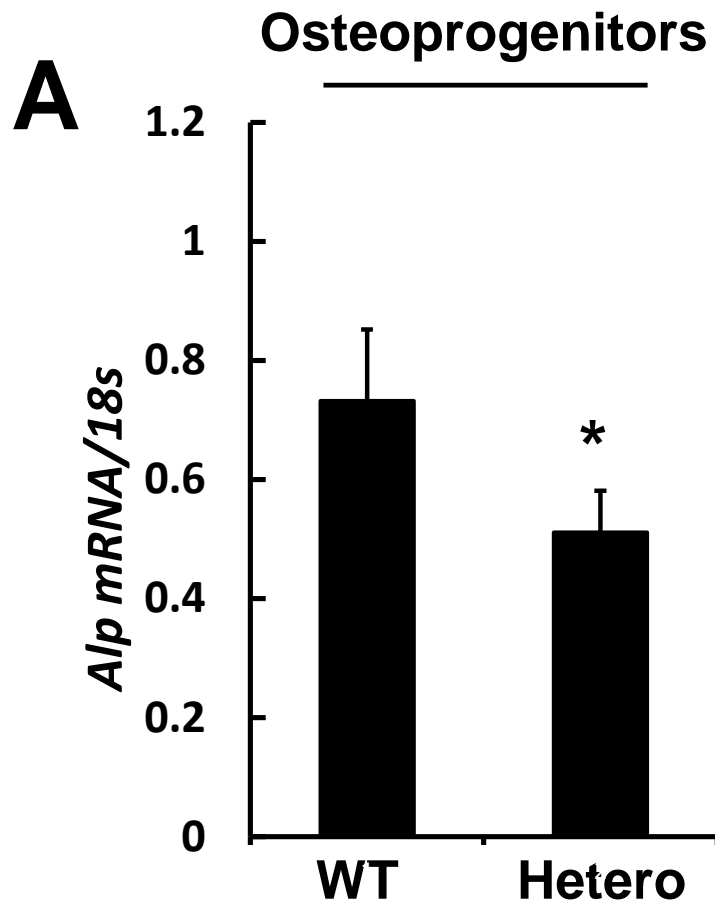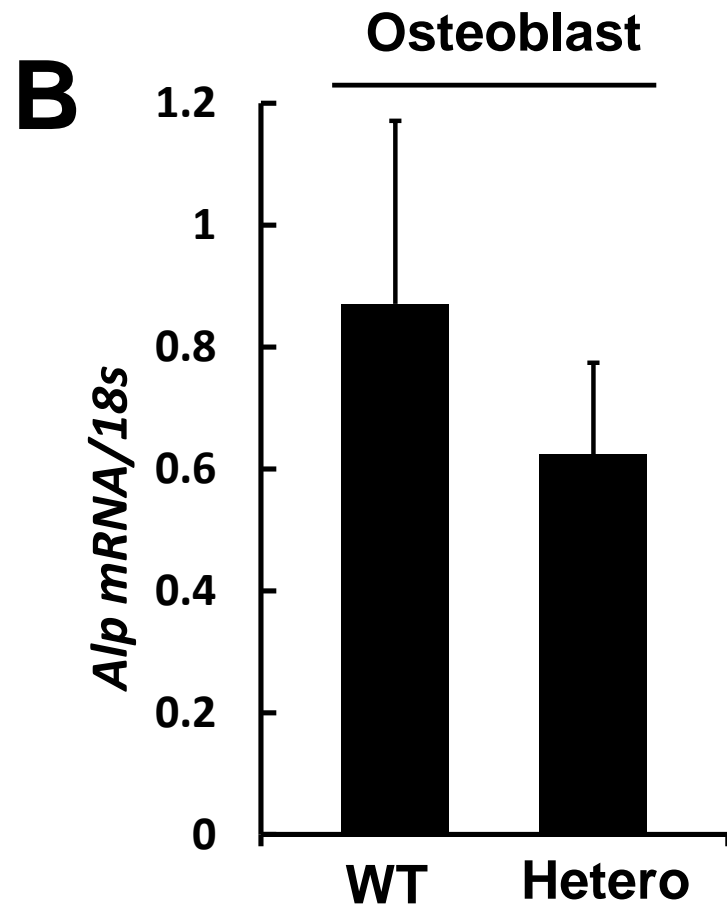

Supplementary Figure 7
